# Supplementary material for: Patient experience of lung volume reduction procedures for emphysema: a qualitative service improvement project
Source: PubMed Central journal article supplement — ERJ Open Res. 2017 Aug 11;3(3):00031-2017. doi: 10.1183/23120541.00031-2017 (PMC5553440; doi:10.1183/23120541.00031-2017), 2017-08-11
Supplement: 00031-2017_S1.pdf [file 00031-2017_S1.pdf]

**Lung Volume reduction: patient pathway questionnaire**

Thankyou for taking part today. We are keen to find out about your experience of having a lung volume procedure to help us to improve the way we care for people with COPD.

Initials: \_\_\_\_\_ Age: \_\_\_\_\_

Please circle one:         Male/Female

- 1) What lung volume procedure did you have? (Please circle): Lung volume reduction surgery  
Bronchoscopic valves

Date: \_\_\_\_\_

- 2) How long were you in hospital for when you had the procedure? \_\_\_\_\_ Days

- 3) Overall all how well do you think it worked? (Please mark with a cross on the line)

Made me much better

no real effect

much worse

---

- 4) How old were you when you were first diagnosed with chest trouble? \_\_\_\_\_ Years

- 5) At what age did it first started to limit what you could do on a day to day basis? \_\_\_\_\_ Years

**The Pathway**

6) What had happened or what was it about your condition that led to you being referred here?

7) How long was it between referral and your first appointment at RBH?

8) What if any difficulties were there when attending you initial appointment at RBH?

9) How well were the investigations explained to you at your initial appointment?

10) How well was the procedure explained to you?

11) What was good about the referral process?

12) What was bad about the referral process?

The procedure

13) Roughly how long did it take from your initial appointment with us to having the procedure?

14) Roughly how long did it take from the decision to have the procedure and the procedure being done?

15) What do you remember was good about having the procedure?

16) What do you remember was bad about the procedure?

17) Were there any unexpected things you encountered during/ after the procedure?

18) Tell me about your experience of the care you received at this time? How could it be improved?

19) How do you feel different as a result of the procedure?

**The follow up**

20) What happened after you went home from hospital? What was good or bad?

21) Looking back on your experience what are the most important things that are positive/negative about your treatment and care?



22) In what way has it changed the way you view and/or manage you COPD?

23) How do you feel you r condition is as a result of the procedure now?

- Much better
- Somewhat better
- About the same
- Somewhat worse
- Much worse

24) If it was up to you how you would change the process?

25) What would you tell other people who have COPD about your experience of the procedure?

26) Looking back now would you have the procedure again?

Yes  No
